# Supplementary material for: Genome-wide analysis of blood lipid metabolites in over 5,000 South Asians reveals biological insights at cardiometabolic disease loci
Source: bioRxiv or medRxiv preprint supplement (doi:10.1101/2020.10.16.20213520), 2020-10-20

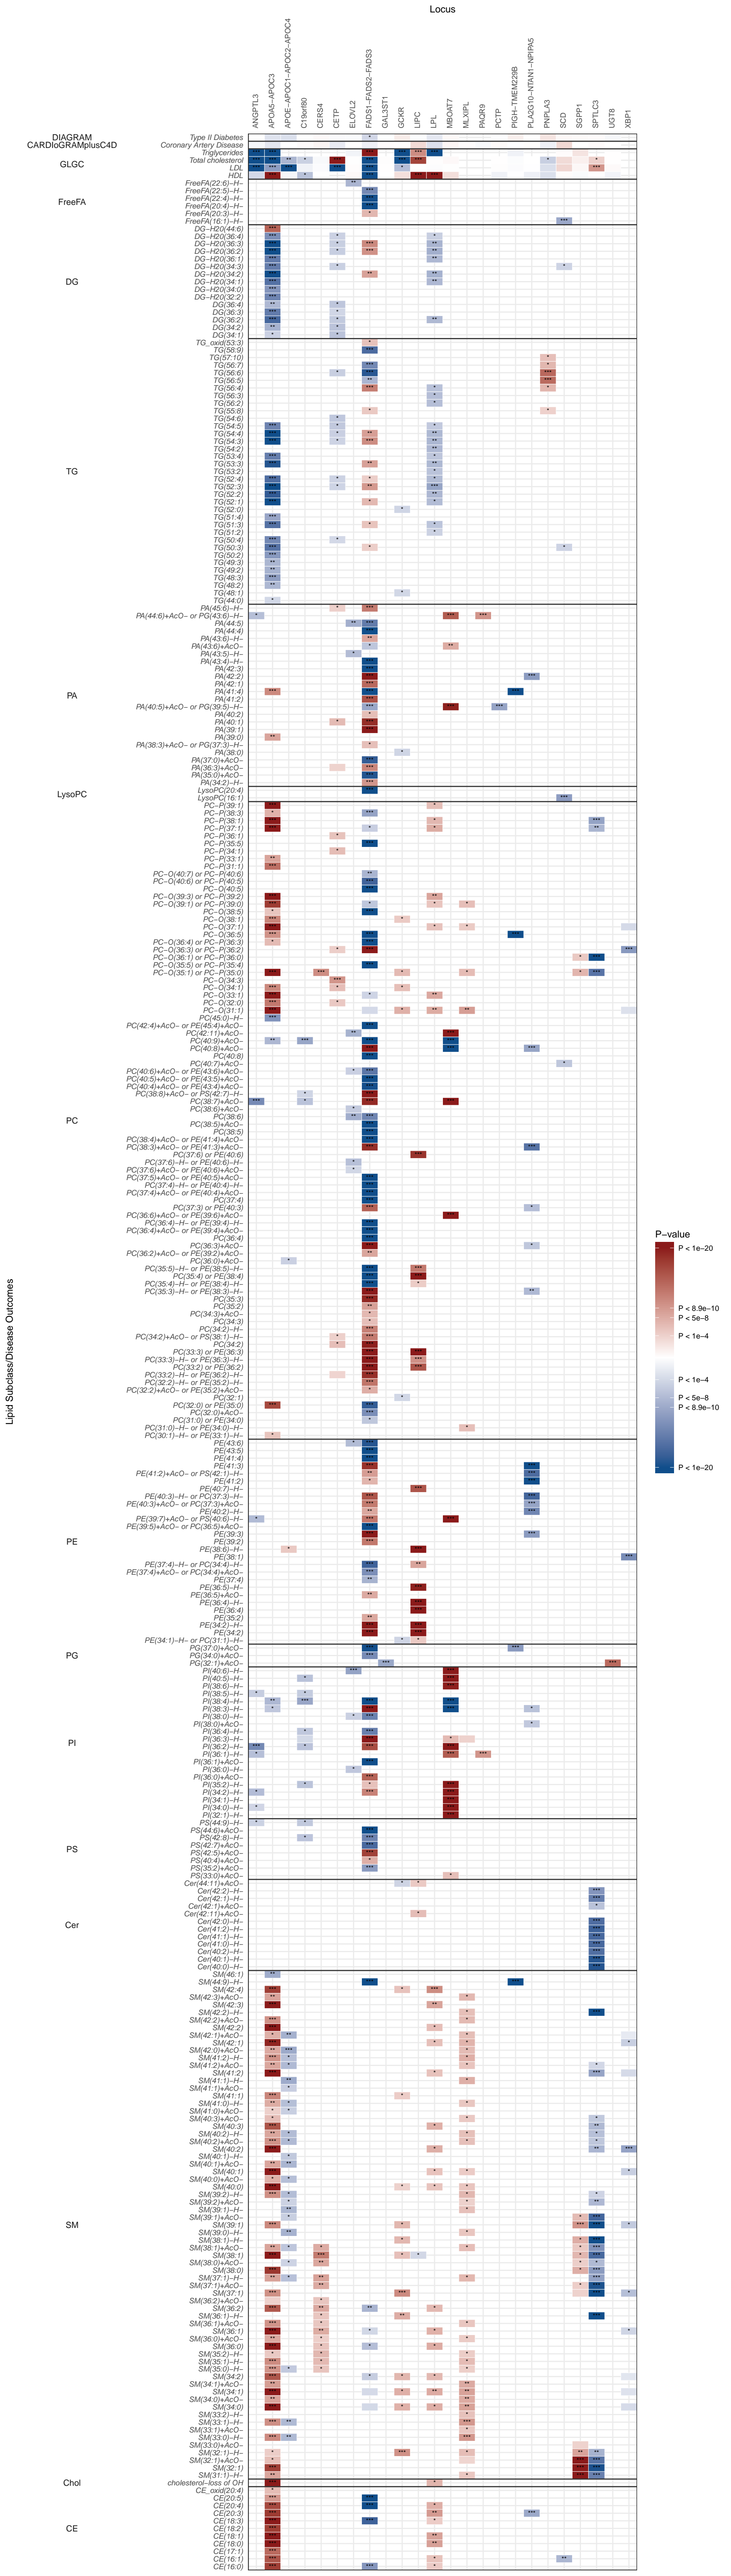

Supplement: Supplementary file [file media-3.pdf]
